# Supplementary material for: Long-term Efficacy of Baricitinib in Adults With Moderate to Severe Atopic Dermatitis Who Were Treatment Responders or Partial Responders: An Extension Study of 2 Randomized Clinical Trials
Source: PubMed Central journal article supplement — JAMA Dermatol. 2021 May 12;157(6):1–9. doi: 10.1001/jamadermatol.2021.1273 (PMC8117062; doi:10.1001/jamadermatol.2021.1273), 2021-05-12
Supplement: jamadermatol-e211273-s002.pdf [file jamadermatol-e211273-s002.pdf]

## Supplementary Online Content

Silverberg JI, Simpson EL, Wollenberg A, et al. Long-term efficacy of baricitinib in adults with moderate to severe atopic dermatitis who were treatment responders or partial responders: an extension study. *JAMA Dermatol*. Published online May 12, 2021. doi:10.1001/jamadermatol.2021.1273

**eMethods.** Supplementary Methods

**eTable 1.** End Points Evaluated in Responders and Partial Responders

**eTable 2.** Mean Change From Baseline Responses in Patient-Reported Harmonizing Outcome Measures for Eczema (DLQI, POEM) at Weeks 16, 32, and 68 of Continuous Treatment for Patients Who Entered BREEZE-AD3 as Responders or Partial Responders

**eTable 3.** Topical Corticosteroid Use During the 52-Week Treatment Period of BREEZE-AD3 for Patients Who Entered BREEZE-AD3 as Responders or Partial Responders

**eFigure.** BREEZE-AD3 Study Design

This supplementary material has been provided by the authors to give readers additional information about their work.

## eMethods. Supplementary Methods

### Study Population

Patients were eligible for enrollment in BREEZE-AD3 if they completed the final active treatment visit in BREEZE-AD1 (NCT03334396), BREEZE-AD2 (NCT03334422), or BREEZE-AD7 (NCT03733301). The eligibility criteria and other key details for these originating studies have been previously described.<sup>9,10</sup> Results for patients originating from BREEZE-AD7 are not reported in this manuscript as the 68-week efficacy follow-up data are not yet available.

### Treatment Protocol

BREEZE-AD3 comprises a screening and baseline period, treatment period 1, treatment period 2, a substudy, and a post-treatment follow-up period (eFigure 1).

#### Screening and Baseline Period

The last treatment visit of the originating study was the screening/baseline visit for BREEZE-AD3 (week 16 of continuous therapy); however, if patients were still completing washout from systemic therapies from the originating study, this period could be extended for a maximum of 8 weeks.

#### Treatment Period 1 (BREEZE-AD3 Weeks 0-52 [Weeks 16-68 of Continuous Therapy])

Responders and partial responders receiving placebo or baricitinib, 1 mg, 2 mg, or 4 mg at completion of the originating study remained on their assigned treatment. If a patient who received placebo or baricitinib, 1 mg, worsened during BREEZE-AD3 to a validated Investigator Global Assessment for AD (vIGA-AD) score  $\geq 3$  (moderate disease) during treatment period 1, they were provided TCS if not currently receiving and rerandomized in a blinded fashion 1:1 to baricitinib, 4 mg or 2 mg. Patients receiving baricitinib, 4 mg or 2 mg at the start of BREEZE-AD3 were not eligible for dose increases.

#### Treatment Period 2 (BREEZE-AD3 Weeks 52-104 [Weeks 68-120 of Continuous Therapy])

At BREEZE-AD3 week 52 (week 68 of continuous therapy), all patients were assessed for eligibility for a randomized withdrawal and downtitration substudy. Patients with vIGA-AD (0,1,2) at week 52 who were assigned baricitinib, 4 mg or 2 mg, at the start of BREEZE-AD3, who were not on a study treatment interruption, and had not used high-potency TCS for the last 14 days were eligible for enrollment in the substudy. Patients receiving baricitinib, 4 mg, were rerandomized 1:1:1 to placebo or baricitinib, 2 mg or 4 mg. Patients receiving baricitinib, 2 mg, were rerandomized 1:1:1 to placebo or baricitinib, 1 mg or 2 mg. Patients enrolled in the substudy were automatically retreated with their original baricitinib dose if their vIGA-AD score became  $\geq 3$ .

Patients not eligible for the randomized withdrawal and downtitration substudy continued on their assigned treatment.

#### Post-treatment Follow-up Period

A post-treatment follow-up visit was carried out approximately 28 days after the last dose of investigational product, either at the end of the study or after early termination.

#### Baricitinib, 2 mg, Open-Label Addendum

An addendum to the study protocol allowed patients to directly enter BREEZE-AD3 without completing an originating study. All patients enrolled under the addendum received open-label baricitinib, 2 mg, for 52 weeks. At week 52, patients meeting the eligibility criteria could participate in the randomized withdrawal and downtitration substudy; otherwise, they continued to be treated with open-label baricitinib, 2 mg.

#### Randomization and Blinding

Randomization was carried out via a computer-generated random sequence using an interactive web-response system (IWRS). Patients randomized on study entry were stratified by disease severity at baseline (vIGA-AD [0,1,2] vs vIGA-AD [3] vs vIGA-AD [4]). Patients rerandomized at week 52 (week 68 of continuous therapy) were stratified by disease severity (vIGA-AD [0,1] vs vIGA-AD [2]).

The IWRS was used to assign blister packs, each containing double-blind investigational product tablets, including identical matching placebo tablets in the randomized withdrawal and downtitration substudy.

**eTable 1. End Points Evaluated in Responders and Partial Responders<sup>a</sup>**

| <b>End point</b>                                                    | <b>BREEZE-AD3 week</b> | <b>Week of continuous therapy<sup>b</sup></b> |
|---------------------------------------------------------------------|------------------------|-----------------------------------------------|
| <b>Primary</b>                                                      |                        |                                               |
| vIGA-AD (0,1)                                                       | Weeks 16, 36, and 52   | Weeks 32, 52, and 68                          |
| <b>Secondary</b>                                                    |                        |                                               |
| EASI75                                                              | Weeks 16, 36, and 52   | Weeks 32, 52, and 68                          |
| Itch NRS $\geq$ 4-point improvement from baseline <sup>c</sup>      | Week 16                | Week 32                                       |
| <b>Exploratory</b>                                                  |                        |                                               |
| Skin Pain NRS $\geq$ 4-point improvement from baseline <sup>c</sup> | Week 16                | Week 32                                       |
| ADSS item 2 $\geq$ 1.5-point improvement from baseline <sup>c</sup> | Week 16                | Week 32                                       |

Abbreviations: ADSS, Atopic Dermatitis Sleep Scale; EASI75, 75% improvement in Eczema Area and Severity Index; NRS, numeric rating scale; vIGA-AD, validated Investigator Global Assessment for Atopic Dermatitis.

<sup>a</sup> Responders and partial responders had vIGA-AD (0,1) or (2), respectively, at entry into BREEZE-AD3 and were never rescued during originating study (BREEZE-AD1/BREEZE-AD2).

<sup>b</sup> Includes 16-week treatment period in the originating studies (BREEZE-AD1/BREEZE-AD2).

<sup>c</sup> Baseline of originating study.

**eTable 2. Mean Change From Baseline Responses in Patient-Reported Harmonizing Outcome Measures for Eczema (DLQI, POEM) at Weeks 16, 32, and 68 of Continuous Treatment for Patients Who Entered BREEZE-AD3 as Responders or Partial Responders<sup>a</sup>**

| End point | BARI, 2 mg<br>(N=54) |                      |                      | BARI, 4 mg<br>(N=70) |                      |                      |
|-----------|----------------------|----------------------|----------------------|----------------------|----------------------|----------------------|
|           | Week 16 <sup>a</sup> | Week 32 <sup>a</sup> | Week 68 <sup>a</sup> | Week 16 <sup>a</sup> | Week 32 <sup>a</sup> | Week 68 <sup>a</sup> |
| DLQI      | -8.0 (6.8)           | -6.7 (8.1)           | -7.9 (7.9)           | -9.6 (6.7)           | -7.7 (6.7)           | -7.1 (6.7)           |
| POEM      | -10.5 (8.4)          | -8.4 (8.8)           | -9.0 (8.1)           | -12.5 (6.8)          | -9.3 (7.8)           | -8.8 (7.6)           |

Data are mean change from baseline (SD). Missing data were imputed using LOCF.

Abbreviations: BARI, baricitinib; DLQI, Dermatology Life Quality Index; LOCF, last observation carried forward; POEM, Patient Oriented Eczema Measure; SD, standard deviation; vIGA-AD, validated Investigator Global Assessment for Atopic Dermatitis.

<sup>a</sup> Responders and partial responders had vIGA-AD (0,1) or (2), respectively, at entry into BREEZE-AD3 and were never rescued during originating study (BREEZE-AD1/BREEZE-AD2).

<sup>b</sup> Data for the modified intention-to-treat population are shown as weeks of continuous therapy, which includes the 16-week treatment period in the originating studies.

**eTable 3. Topical Corticosteroid Use During the 52-Week Treatment Period of BREEZE-AD3 for Patients Who Entered BREEZE-AD3 as Responders or Partial Responders<sup>a</sup>**

| <b>Topical corticosteroid</b> | <b>BARI, 2 mg<br/>(N=54)</b> | <b>BARI, 4 mg<br/>(N=70)</b> |
|-------------------------------|------------------------------|------------------------------|
| Low and moderate potency use  |                              |                              |
| n (%)                         | 22 (41)                      | 37 (53)                      |
| Low potency <sup>b</sup>      |                              |                              |
| Mean, g                       | 14                           | 15                           |
| Median, g                     | 0                            | 0                            |
| IQR, g                        | 0-0                          | 0-5                          |
| Moderate potency <sup>c</sup> |                              |                              |
| Mean, g                       | 31                           | 53                           |
| Median, g                     | 0                            | 0                            |
| IQR, g                        | 0-33                         | 0-48                         |

Abbreviations: IQR, interquartile range; vIGA-AD, validated Investigator Global Assessment for Atopic Dermatitis.

<sup>a</sup> Responders and partial responders had vIGA-AD (0,1) or (2), respectively, at entry into BREEZE-AD3 and were never rescued during originating study (BREEZE-AD1/BREEZE-AD2).

<sup>b</sup> Hydrocortisone 2.5% ointment.

<sup>c</sup> Triamcinolone 0.1% cream.

**eFigure. BREEZE-AD3 Study Design**

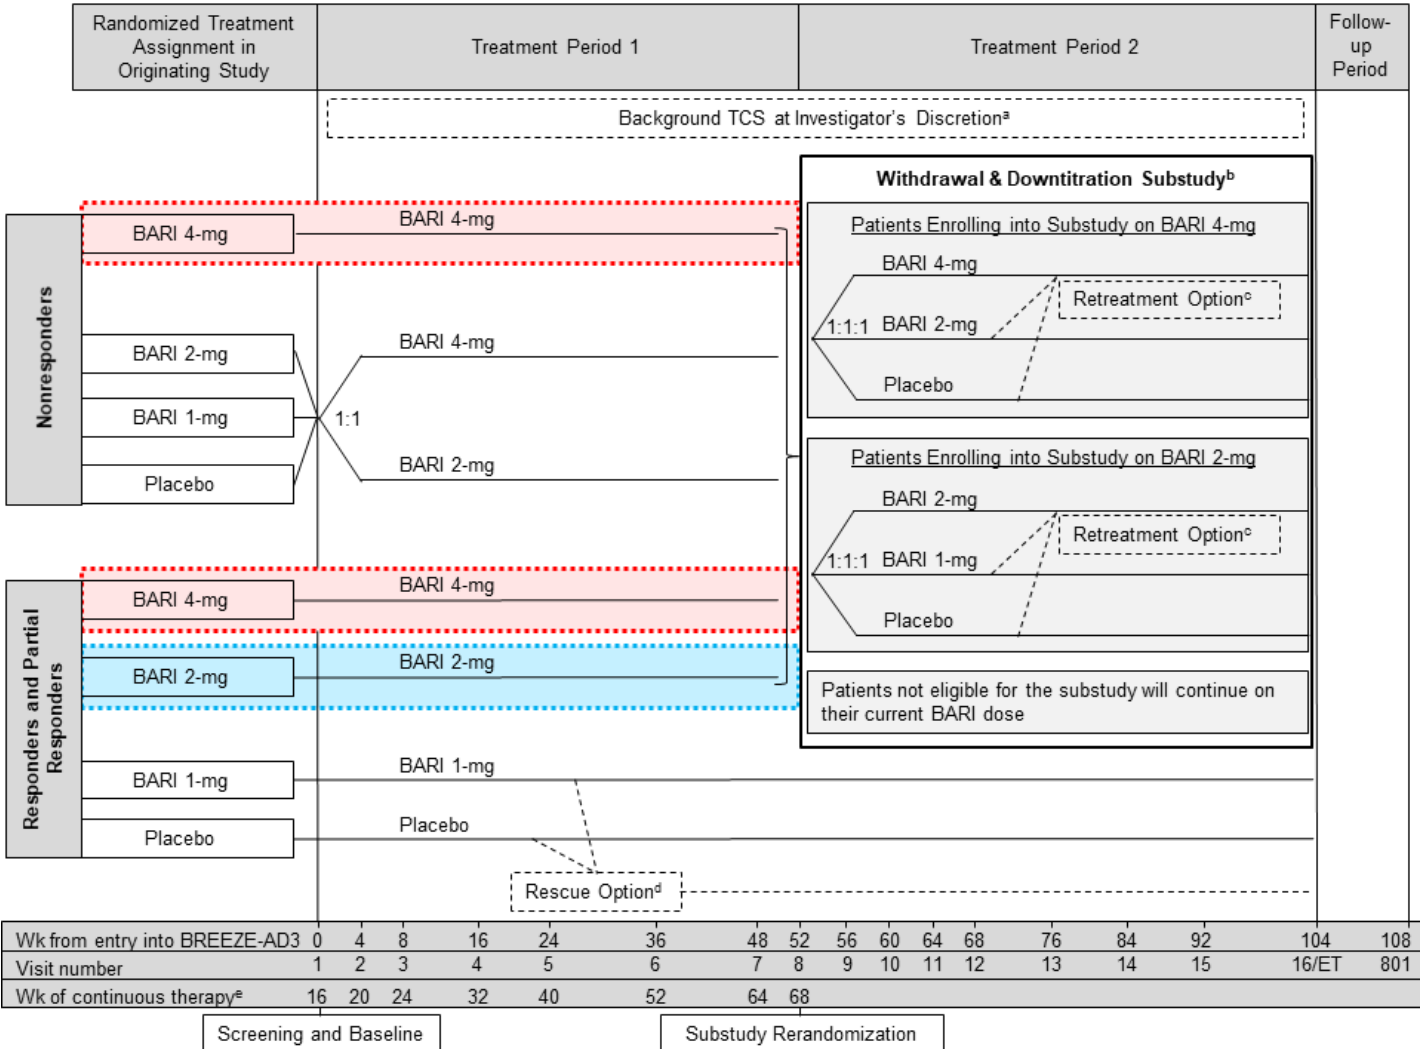

Red and blue shading indicates data that are reported in this manuscript; responders and partial responders were patients who had a vIGA-AD (0,1) or (2) and were never rescued during the originating study (BREEZE-AD1/BREEZE-AD2); all patients who received continuous baricitinib, 4 mg, through BREEZE-AD1/BREEZE-AD2 and BREEZE AD3.

Abbreviations: BARI, baricitinib; ET, early termination; TCS, topical corticosteroids; vIGA-AD, validated Investigator Global Assessment for Atopic Dermatitis; Wk, week.

<sup>a</sup> Background TCS may have been initiated or reinitiated at any time during the study and were to be provided as part of rescue or re-treatment any time a patient's vIGA-AD score became  $\geq 3$ .

<sup>b</sup> Eligible patients were rerandomized in the withdrawal and downtitration substudy. Patients who did not enroll in the substudy remained on their assigned treatment.

<sup>c</sup> Patients enrolled in the substudy were automatically re-treated if their vIGA-AD score became  $\geq 3$ .

<sup>d</sup> Rescue to baricitinib, 4 mg or 2 mg, was available if their vIGA-AD score became  $\geq 3$ .

<sup>e</sup> Applicable for patients who received the same treatment in the originating study (BREEZE-AD1/BREEZE-AD2) through BREEZE-AD3.
